# Supplementary material for: Intraoperative mapping of pre-central motor cortex and subcortex: a proposal for supplemental cortical and novel subcortical maps to Penfield’s motor homunculus
Source: Research Square preprint supplement (doi:10.21203/rs.3.rs-115348/v1), 2020-12-11
Supplement: Supplementary file 1 [file 532263b3adf272e11f8c1555.pdf]

## Supplemental Materials

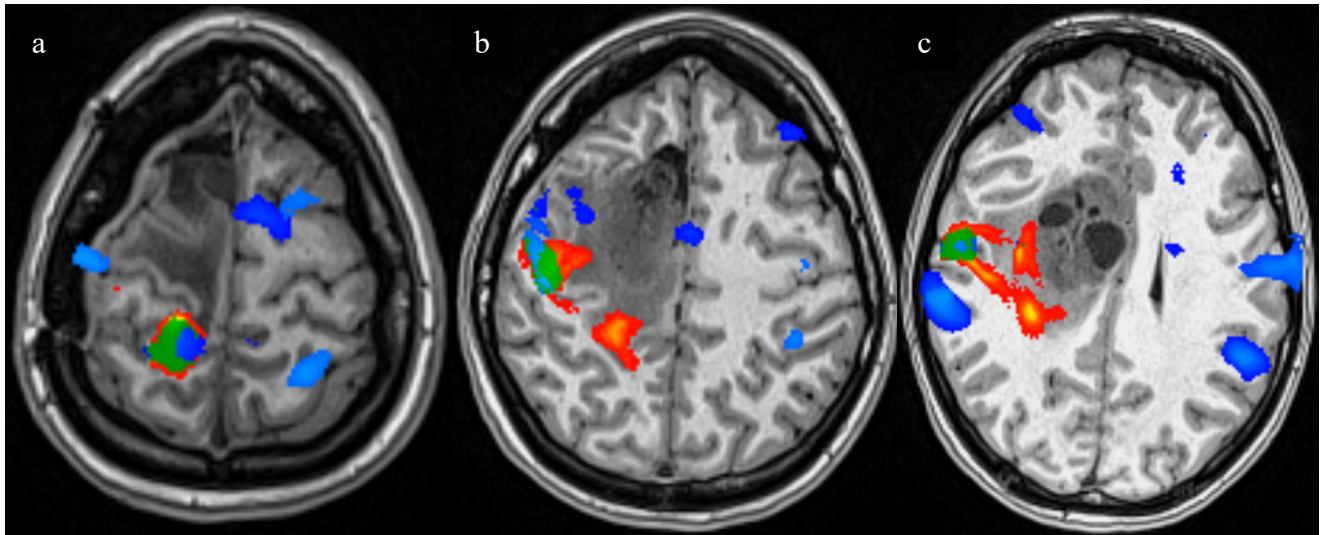

**Supplemental Figure 1 (a,b,c): fMRI demonstrating complex motor function mapping (a-foot rock task, b-Finger tapping, c-lip smacking) demonstrating cortical complex motor function representation of CST (36y left-handed female with recurrent right frontal transformed WHO Grade III IDH 1 mutant MGMT methylated anaplastic gemistocytic astrocytoma who underwent subtotal resection)**

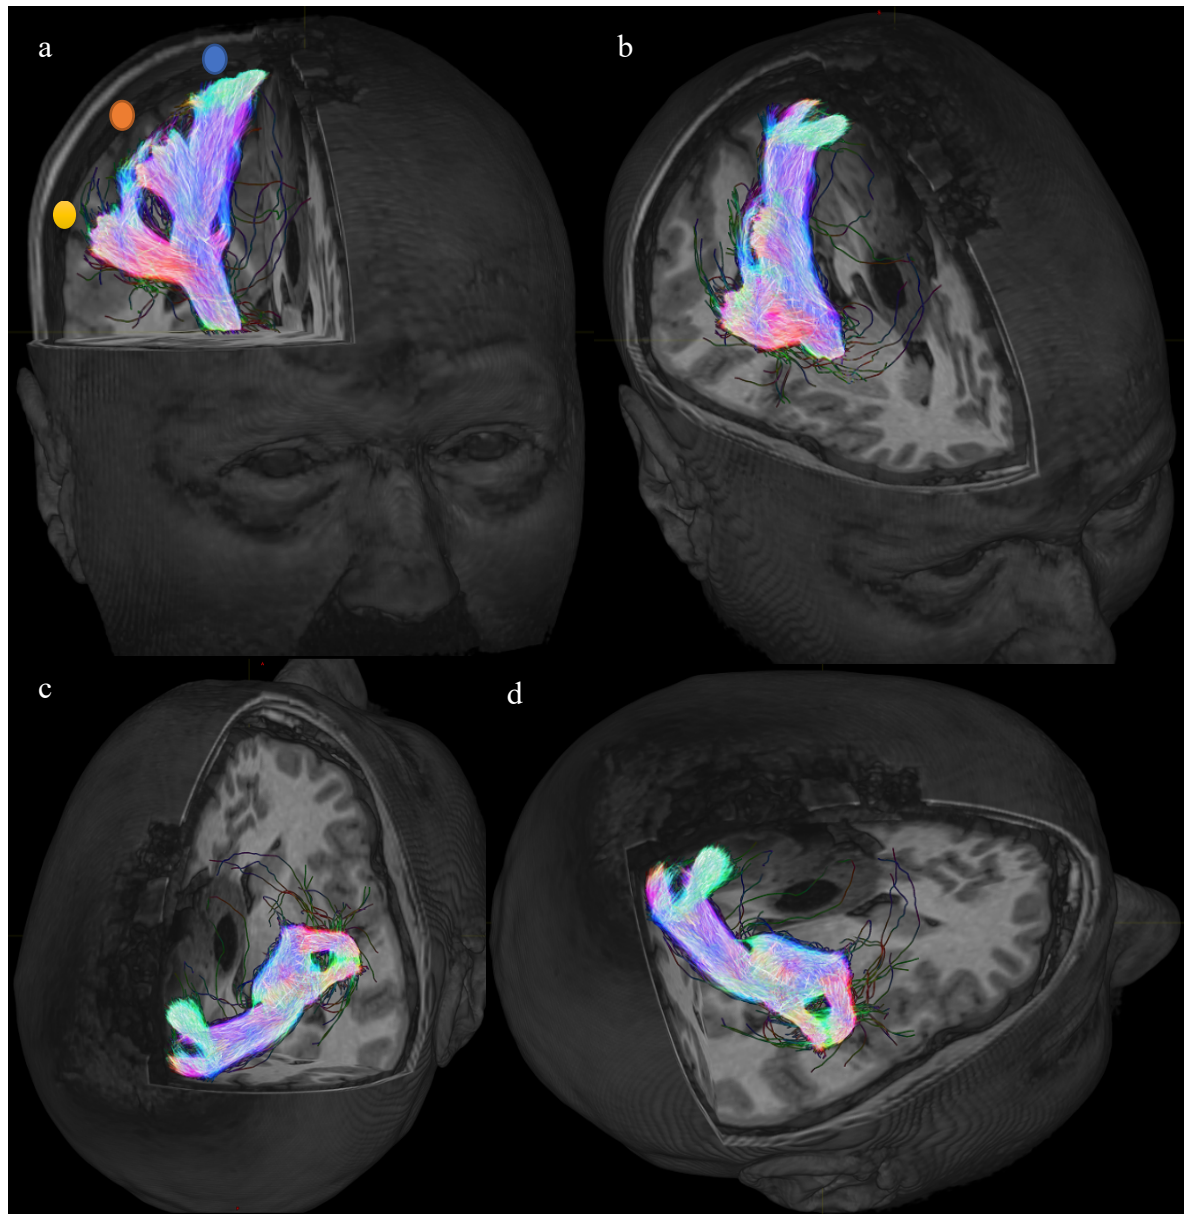

**Supplementary Figure 2 (a,b,c,d): Pre-operative 3D Reconstruction of Cortical and subcortical corticospinal tract**(*foot: blue circle, hand:orange circle, face: yellow circle representation*) utilizing Constrained Probabilistic tractography and modelling (MRTrix opensource software<sup>16</sup>)(*36y left-handed female with recurrent right frontal transformed WHO Grade III IDH 1 mutant MGMT methylated anaplastic gemistocytic astrocytoma who underwent subtotal resection*)

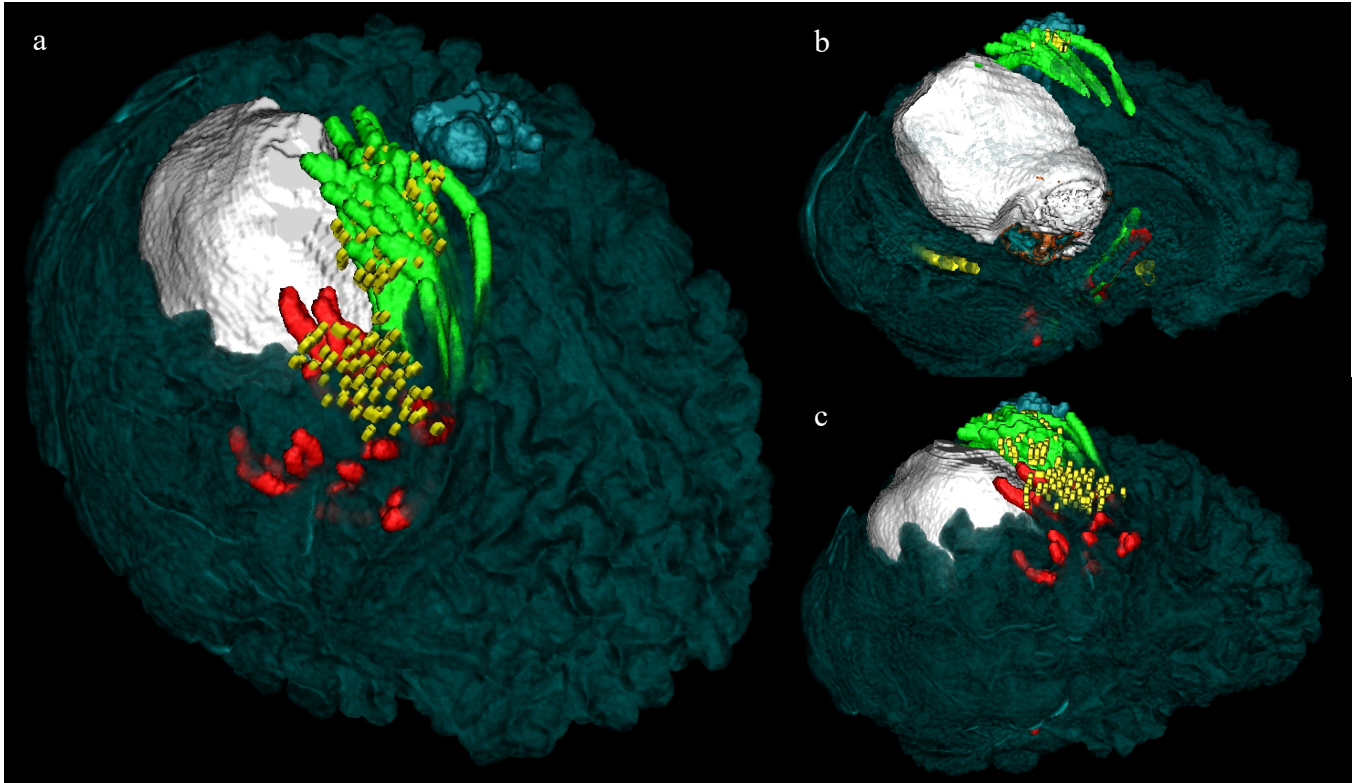

**Supplemental Figure 3 (a,b,c):** Integration of nTMS motor stimulation points with DTI reconstruction with neuronavigation (StealthStation Medtronic S7 machine, StealthViz software) (*White -Tumour, Red – CST (Face + Upper Limb), Green – CST (Lower Limb), Yellow dots – TMS Motor map, Blue Tractography – CST (contralateral to the lesion)*)(22y male with right cystic-solid parietal WHO grade I IDH wildtype, ATRX wildtype, MGMT unmethylated pilocytic astrocytoma who underwent gross total resection)



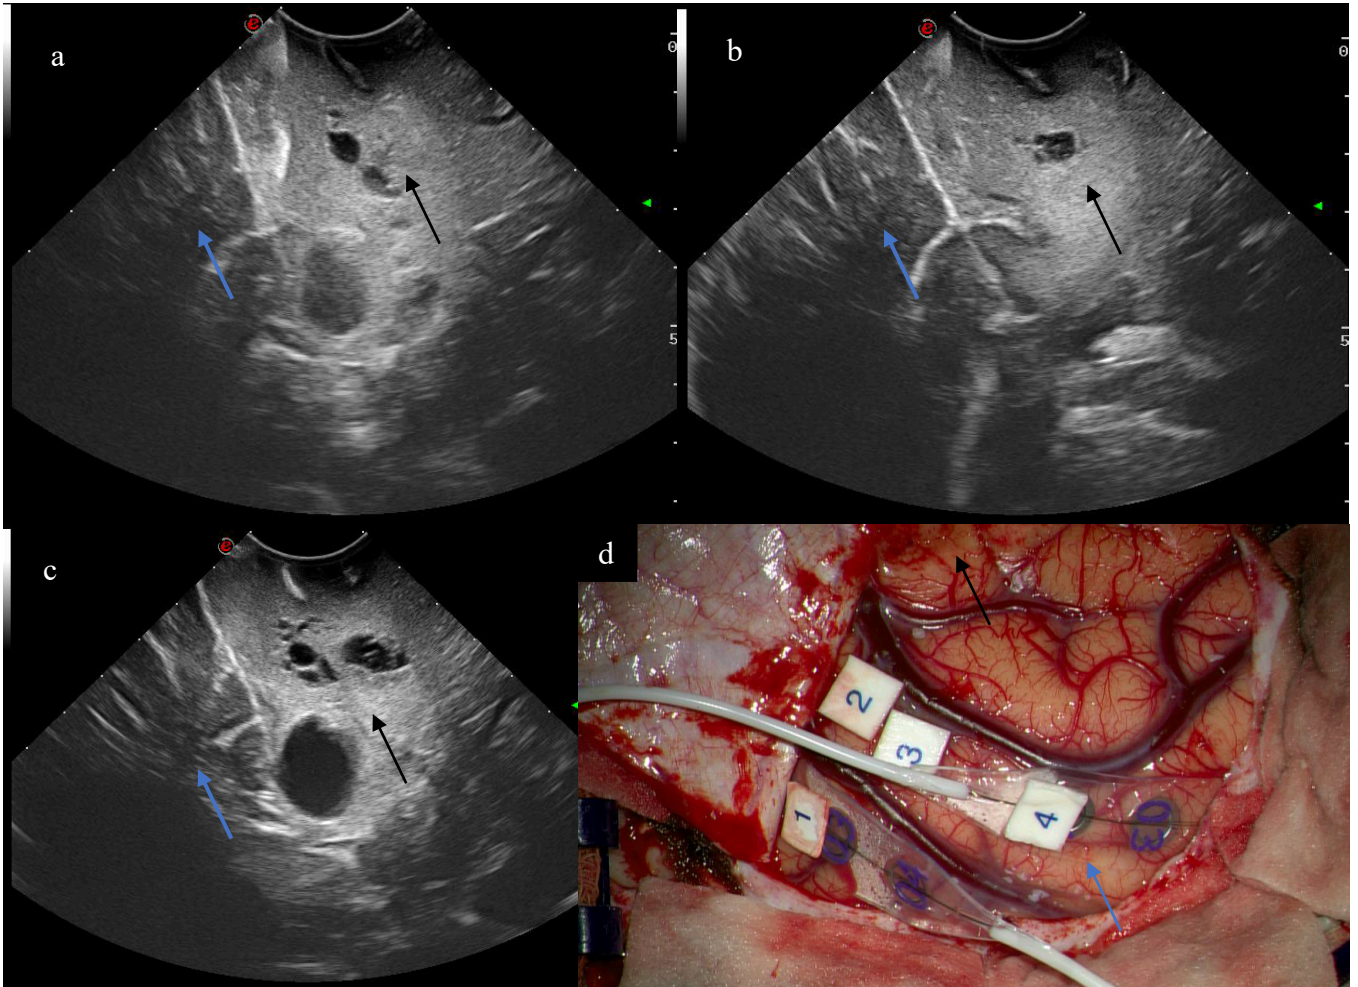

**Supplemental Figure 4 (a,b,c) :Intraoperative pre-resection ultrasound (ioUS) demonstrating right frontal tumour and its relation to the pre-central cortex at the cortical and subcortical level ; (d) : Intraoperative image with cortical mapping (Tag 1 – Lower Limb, Tag 2 – Lower Limb and Intercostal Muscles, Tag 3 – Intercostal Muscles, Tag 4 – Forearm, Strip Number 1 – Monitoring the Foot, Strip Number 2 – Monitoring the Hand)(Black arrow: tumour location, blue arrow: cortical motor cortex and subcortical CST)(36y left-handed female with recurrent right frontal transformed WHO Grade III IDH 1 mutant MGMT methylated anaplastic gemistocytic astrocytoma who underwent subtotal resection)**



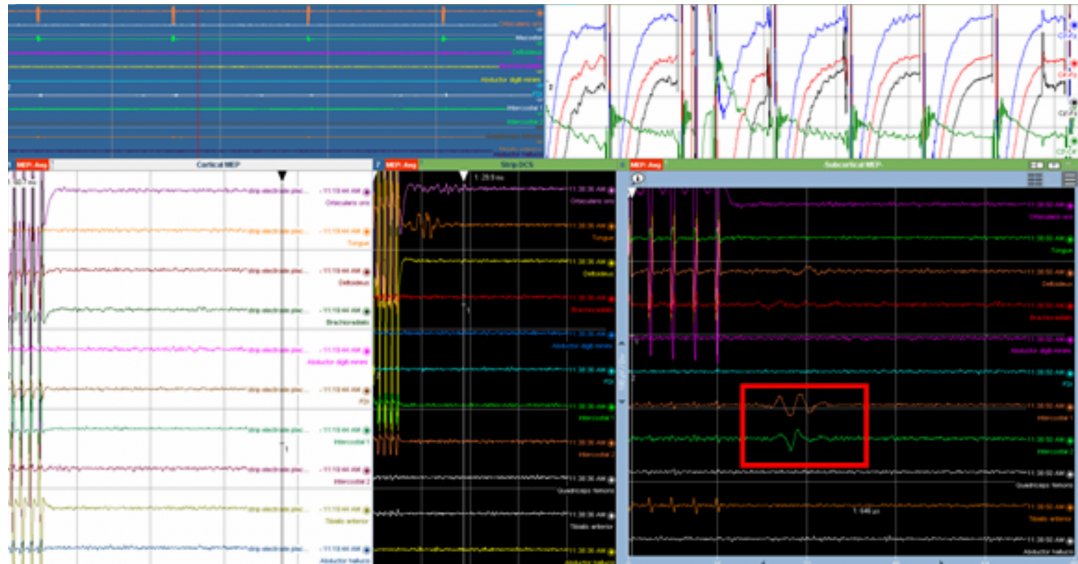

**Supplemental Figure 5: Isolated Subcortical stimulation of intercostal muscles during intraoperative subcortical mapping**

**Supplemental Table 1: Literature Review of Subcortical intraoperative mapping demonstrating each mapped area**

| S<br>N | Articles                                    | N       | Technique                                                                    | Pathology                                   | Mapped Areas |                              |     |      |      | MT<br>(mA)              |
|--------|---------------------------------------------|---------|------------------------------------------------------------------------------|---------------------------------------------|--------------|------------------------------|-----|------|------|-------------------------|
|        |                                             |         |                                                                              |                                             | Leg          | Trunk                        | Arm | Hand | Face |                         |
| 1.     | (Duffau <i>et al.</i> , 2003) <sup>36</sup> | 39      | Bipolar                                                                      | Glioma                                      | +            | -                            | +   | +    | +    | -                       |
| 2.     | (Mikuni <i>et al.</i> , 2007) <sup>10</sup> | 21      | Monopolar<br>Train of 4<br>(cortical)<br>Bipolar train of<br>4 (subcortical) | Glioma<br>Cavernoma<br>Ependy-<br>mo-<br>ma | +            | -                            | +   | +    | -    | 5-15                    |
| 3.     | (Bello <i>et al.</i> , 2008) <sup>8</sup>   | 57      | Monopolar                                                                    | Glioma                                      | +            | -                            | +   | +    | -    | 3.5-16                  |
| 4.     | (Vassal <i>et al.</i> , 2013) <sup>9</sup>  | 10      | Monopolar                                                                    | Glioma                                      | +            | -                            | +   | +    | +    | -                       |
| 5.     | (Bello <i>et al.</i> , 2014) <sup>37</sup>  | 59<br>1 | High frequency<br>(monopolar) vs<br>Low frequency<br>(bipolar)               | Glioma                                      | +            | -                            | +   | +    | +    | HF: 5-<br>13<br>LF: 2-6 |
| 6.     | (Ghimire <i>et al.</i> , 2019) <sup>7</sup> | 1       | Monopolar<br>(Train of 5)                                                    | Glioma                                      | -            | +<br>Intercost-<br>al muscle | -   | -    | -    | 5                       |

*MT: motor threshold, mA: milliamperes*

**Supplemental Table 2: Case series of cortical and subcortical intercostal muscles Stimulation (MEP)**

| SN | Age | Location of lesion  | Histopathology                                                                                                   | Cortical stimulation | Subcortical stimulation | nTMS pre-op |
|----|-----|---------------------|------------------------------------------------------------------------------------------------------------------|----------------------|-------------------------|-------------|
| 1  | 53y | Right SMA           | Anaplastic Oligodendroglioma Grade III (IDH -, ATRX preserved)                                                   | N                    | Y; 4mA                  | Yes         |
| 2  | 64y | Right parietal      | Metastatic malignant melanoma                                                                                    | N                    | Y; 4mA                  | Yes         |
| 3  | 35y | Right SMA           | Oligodendroglioma Grade III (IDH1 mutant, ATRX preserved)                                                        | N                    | Y; 5mA                  | Yes         |
| 4  | 69y | Left Precentral     | Radiation induced Vascular malformation                                                                          | Y; 14 mA             | Y; 6mA                  | No          |
| 5  | 31y | Right parietal      | Glioblastoma Grade IV (IDH wild; ATRX preserved; MGMT unmethylated)                                              | N                    | Y; 6mA                  | No          |
| 6  | 62y | Left Precentral     | Metastatic Carcinoma Lung                                                                                        | Y;12mA               | N                       | Yes         |
| 7  | 41y | Left Central lobule | Metastatic Breast Carcinoma                                                                                      | Y: 10mA              | N                       | Yes         |
| 8  | 56y | Left precentral     | Metastatic lung Carcinoma                                                                                        | Y: 6mA               | Y; 12 mA                | Yes         |
| 9  | 57y | Right frontal       | Anaplastic oligodendroglioma (IDH-mutant, grade III IDH1 R132H clone positive (IHC) ATRX retained)               | Y: 10mA              | Y                       | Yes         |
| 10 | 36y | Right frontal       | Anaplastic gemistocytic astrocytoma (IDH mutant, WHO grade III ATRX lost)                                        | Y                    | N                       | Yes         |
| 11 | 36y | Left precentral     | Glioblastoma, IDH-wildtype, grade IV (WHO)<br>(IDH wildtype ATRX expression retained Unmethylated MGMT promoter) | N                    | Y; 5mA                  | Yes         |



*nTMS: navigated transcranial magnetic stimulation; SMA: supplementary motor area; IDH: isocitrate dehydrogenase ; ATRX: alpha-thalassemia/mental retardation, X-linked; MGMT: Methyl Guanine Methyl Transferase ; IHC: immunohistochemistry ; mA: milliamperes*
